# Supplementary material
Source: Springer Nature journal article supplement (https://www.springermedizin.de/resource/supplementary/12943_2010_689_MOESM1_ESM.pdf/9554588)

### A Phase contrast

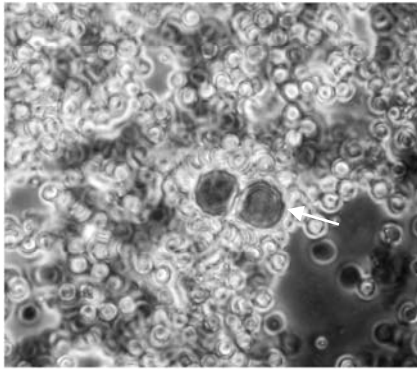

### Fluorescence

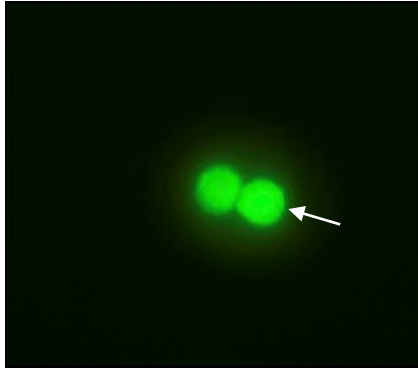

### B

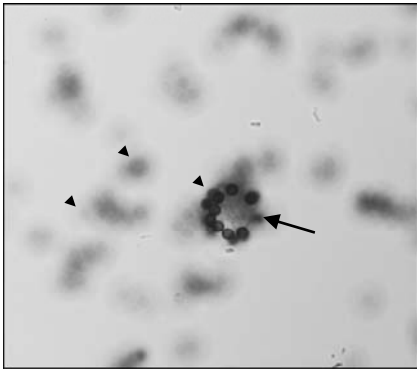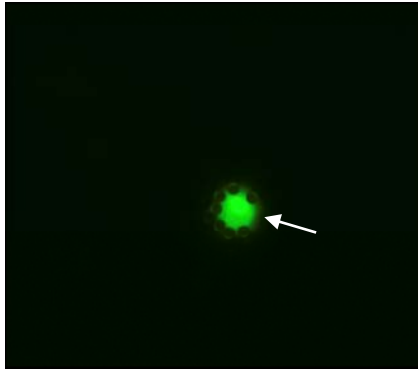

### C

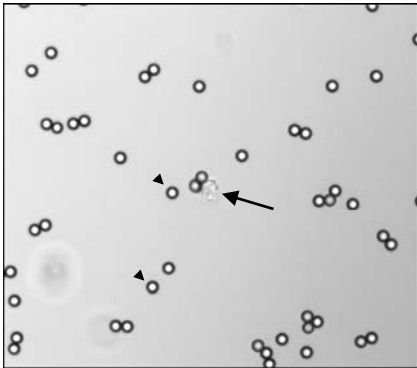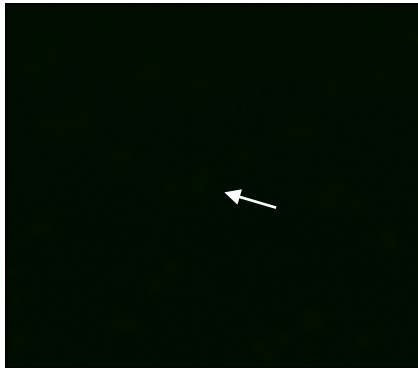

### D

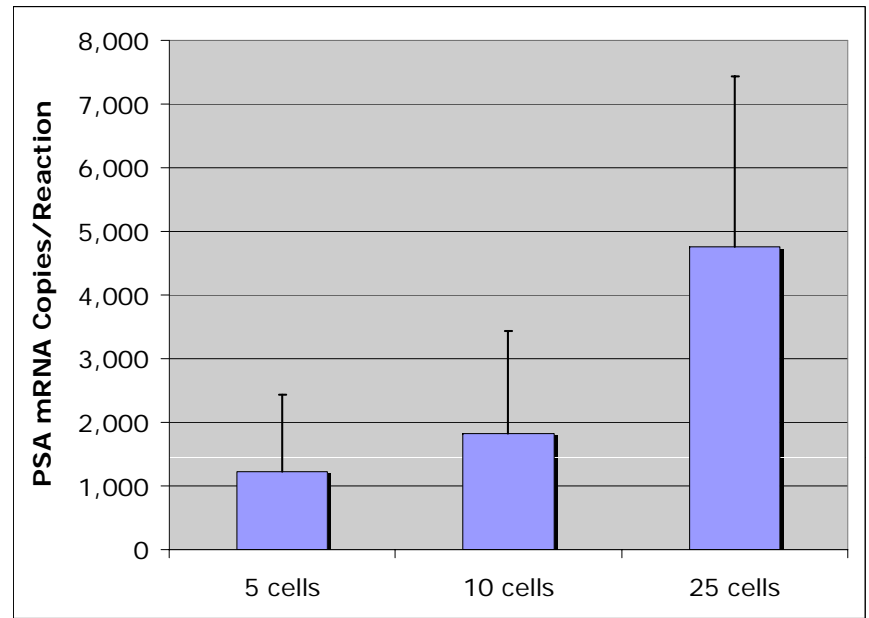

### E

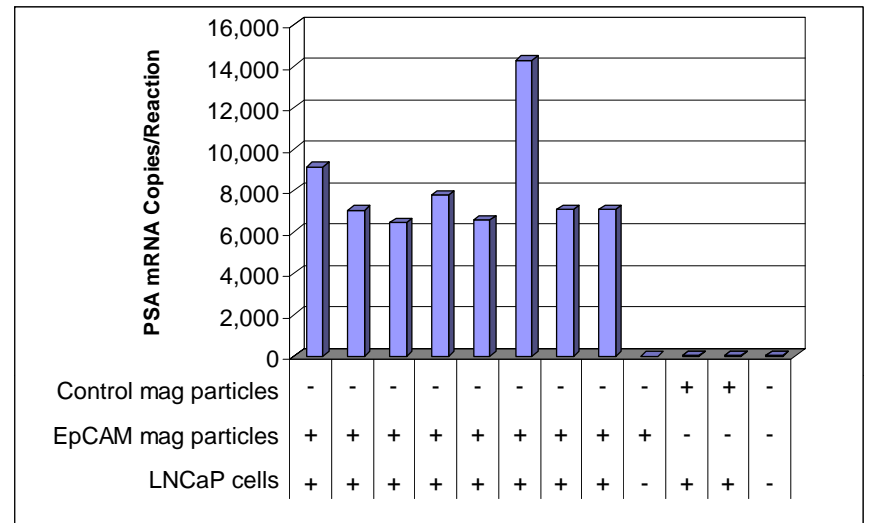

Supplement: MOESM1 [file 9554588]
